# Supplementary material
Source: Springer Nature journal article supplement (https://www.springermedizin.de/resource/supplementary/12889_2008_1520_MOESM5_ESM.pdf/9503332)

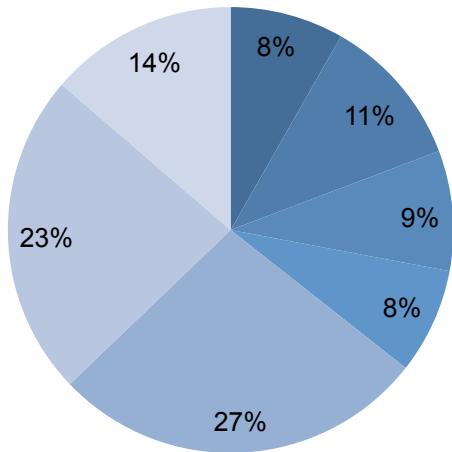

- 0-5 years
- 6-12 years
- 13-17 years
- 18-24 years
- 25-44 years
- 45-64 years
- 65+ years

Supplement: MOESM5 [file 9503332]
